# Supplementary material
Source: publisher figshare collection journal article supplement (https://acs.figshare.com/ndownloader/files/4170055)
Supplement: Supplementary file 1 [file 4170055]

## Supplementary Information

### Adaptive two-dimensional micro-gas chromatography

Jing Liu,<sup>ab</sup> Maung Kyaw Khaing Oo,<sup>ab</sup> Karthik Reddy,<sup>abc</sup> Yogesh B. Gianchandani,<sup>bc</sup> Jack C. Schultz,<sup>d</sup> Heidi M. Appel,<sup>d</sup> and Xudong Fan<sup>\*ab</sup>

<sup>a</sup>Department of Biomedical Engineering, University of Michigan

1101 Beal Avenue, Ann Arbor, Michigan 48109, USA

<sup>b</sup>Center for Wireless Integrated Microsensing and Systems, University of Michigan

1301 Beal Avenue, Ann Arbor, Michigan 48109, USA

<sup>c</sup>Department of Electrical Engineering and Computer Science, University of Michigan

1301 Beal Avenue, Ann Arbor, Michigan, 48109, USA

<sup>d</sup>College of Agriculture Food and Natural Resources, University of Missouri

Bond Life Sciences Center, 1201 Rollins Road, Columbia, Missouri, 65211, USA

\*Corresponding author: [xsfan@umich.edu](mailto:xsfan@umich.edu)

## Stop-flow test

Before conducting real 2-D separation, the system was demonstrated to be able to suspend the separation at the 1<sup>st</sup>-dimensional column without interrupting the separation at the 2<sup>nd</sup>-dimensional column. The experimental setup was the same as the single 2<sup>nd</sup>-dimensional column system illustrated in Fig. 2(A), except that the thermal modulator was not in use. The chromatograms shown in Fig. S1(A) were obtained from Detector #1 and #2 with no stop-flow manipulation, which serves as the reference. In the stop-flow test shown in Fig. S1(B), the valve was switched to disconnect the 1<sup>st</sup>- and 2<sup>nd</sup>-dimensional column twice. The first time started at  $t=20$  s after the elution of Analyte #1 and the second started at  $t=180$  s after the elution of Analyte #2. The stop-flow (*i.e.*, the disconnection) duration in both cases was 120 seconds. Comparison of the elution times with and without the stop-flow (see details in Table S1) shows that Analyte #2 and #3 in the 1<sup>st</sup>-dimensional column were delayed once (120 seconds) and twice (240 seconds), respectively, whereas the retention time of all analytes in the 2<sup>nd</sup>-dimensional column (elution time recorded by Detector #2 – elution time recorded by Detector #1) remained the same. In addition, no significant peak broadening caused by the stop-flow manipulation was observed. These results suggest that, when the 1<sup>st</sup>- and 2<sup>nd</sup>-dimensional columns are disconnected, the separation at the 1<sup>st</sup>-dimensional column can be successfully suspended without any interference to the subsequent separation at the 2<sup>nd</sup>-dimensional column.

## Calculation of retention time at the 1<sup>st</sup>- and 2<sup>nd</sup>-dimensional column

The retention time at the 1<sup>st</sup>- and 2<sup>nd</sup>-dimensional column can be calculated by the following equations:

1<sup>st</sup> retention time=Elution time recorded by Detector #1–total prior suspension time in the 1<sup>st</sup>-dimensional column.

2<sup>nd</sup> retention time=Elution time recorded by Detector #2–the corresponding thermal modulator turn-on time.

The parameters described in above equations can be found in the real-time chromatogram obtained from Detector #1 and #2. The total prior suspension time in the 1<sup>st</sup>-dimensional column is represented by the sum of the durations outside the solid boxes that precede the peak recorded by Detector #1. The corresponding thermal modulator turn-on time is represented by the beginning of the dashed box that contains the peak(s) recorded by Detector #2. Below we show some examples.

**Single 2<sup>nd</sup>-dimensional column system.** In Fig. 3(A), the 1<sup>st</sup> retention time of Analyte #2 = 139 s (elution time recorded by Detector #1) – 60 s (total prior suspension time in the 1<sup>st</sup>-dimensional column) = 79 s. The 2<sup>nd</sup> retention time of Analyte #2 = 166 s (elution time recorded by Detector #2) – 154 s (the corresponding thermal modulator turn-on time) = 12 s.

**Dual 2<sup>nd</sup>-dimensional column system.** In Fig. 5(A), the 1<sup>st</sup> retention time of Analyte #5 = 52 s (elution time recorded by Detector #1) – 22 s (total prior suspension time in the 1<sup>st</sup>-dimensional column) = 30 s. The 2<sup>nd</sup> retention time of Analyte #5 = 64 s (elution time recorded by Detector #2A) – 56 s (the corresponding thermal modulator turn-on time) = 8 s.

Once the 1<sup>st</sup>- and 2<sup>nd</sup>-dimensional retention times are known, construction of a 2-D chromatogram becomes very straightforward. The overall 2-D construction process is much simpler than that in a conventional 2-D GC system where tremendous and complex information needs to be extracted and re-assembled.

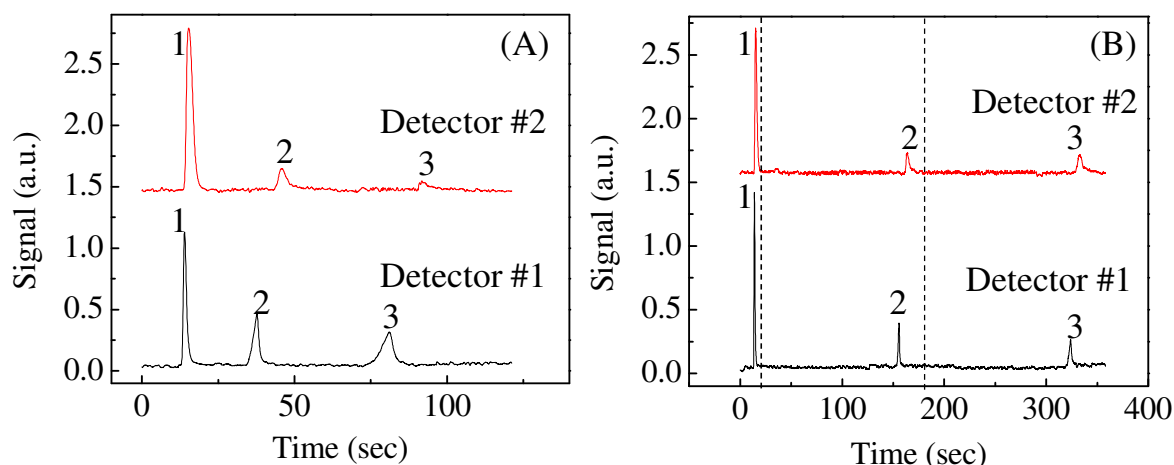

Figure S1. Chromatograms of three alkanes obtained from the adaptive 2-D  $\mu$ GC system shown in Fig. 2(A), but without using the thermal modulator. (A) Chromatograms corresponding to the configuration in which the 1<sup>st</sup>- and 2<sup>nd</sup>-dimensional columns were connected all the time. Curves are vertically shifted for clarity. (B) The 1<sup>st</sup>- and 2<sup>nd</sup>-dimensional columns were disconnected twice. The first disconnection was from 20 s to 140 s (disconnection start-time is marked by the left dashed line and disconnection duration=120 s), and the second from 180 s to 300 s (disconnection start-time is marked by the right dashed line and disconnection duration=120 s). The retention delay of Analyte #2 and #3 in the 1<sup>st</sup>-dimensional (2<sup>nd</sup>-dimensional) column is 117.7 (117.7) s and 240.8 (240.4) s, respectively. The delay time agrees well with the total disconnection duration that Analyte # 2 and #3 experienced, suggesting that the flow of analytes in the 1<sup>st</sup>-dimensional column could be completely stopped. Curves are vertically shifted for clarity. Analytes: 1. pentane; 2. octane; 3. nonane. The 1<sup>st</sup>-dimensional column was 1.5 m long and was coated with RTX-1. The 2<sup>nd</sup>-dimensional column was 0.8 m long and was coated with Carbowax.

Table S1: Elution times obtained from Fig. S1(A) and (B).

|            | <b>Without stop-flow (Fig. S1(A))</b> |             | <b>With stop-flow (Fig. S1(B))</b> |                            |
|------------|---------------------------------------|-------------|------------------------------------|----------------------------|
|            | Detector#1                            | Detector #2 | Detector#1                         | Detector #2                |
| Analyte #1 | 13.8 s                                | 15.4 s      | 13.8 s                             | 15.4 s                     |
| Analyte #2 | 37.8 s                                | 46.0 s      | 155.5 s<br>(delay=117.7 s)         | 163.7 s<br>(delay=117.7 s) |
| Analyte #3 | 81.2 s                                | 92.2 s      | 322.0 s<br>(delay=240.8 s)         | 332.6 s<br>(delay=240.4 s) |
